# Supplementary material
Source: publisher site journal article supplement (https://www.dovepress.com/article/344857)

## **Secretory autophagosomes from alveolar macrophages exacerbate acute respiratory distress syndrome by releasing IL-1 $\beta$**

**Supplementary Figure S1.** The autophagosome-specific marker LC-3 of the isolated SAPs from RAW264.7 cells was detected by flow cytometry assays. The experiments have been repeated for three times.

**Supplementary Figure S2.** Western blot analysis revealed that compared with apoptotic bodies, microvesicles and exosomes from RAW264.7 cells, the expression patterns of Apaf-1 (a marker of apoptotic bodies), CD40L (a marker of MVs) and CD63 (a marker for exosomes) were not found in secretory autophagosomes released from RAW264.7 cells.

**Supplementary Figure S3.** The images of total protein staining of same sample used in Figure 2E.

**Supplementary Figure S4.** The mice were treated with rapamycin or 3-MA 2 hours before intratracheal LPS injection. A. Histopathological images of lung tissues from mice that were administered LPS with or without pretreatment by rapamycin or 3-MA (H&E staining, Scale bar = 200  $\mu$ m). B. The injury scores of the lung tissue (n = 7/each group). The experiments have been repeated for at least three times. Each value represents the mean  $\pm$  SD of three independent experiments, ns= not significance.

Supp Fig S1.

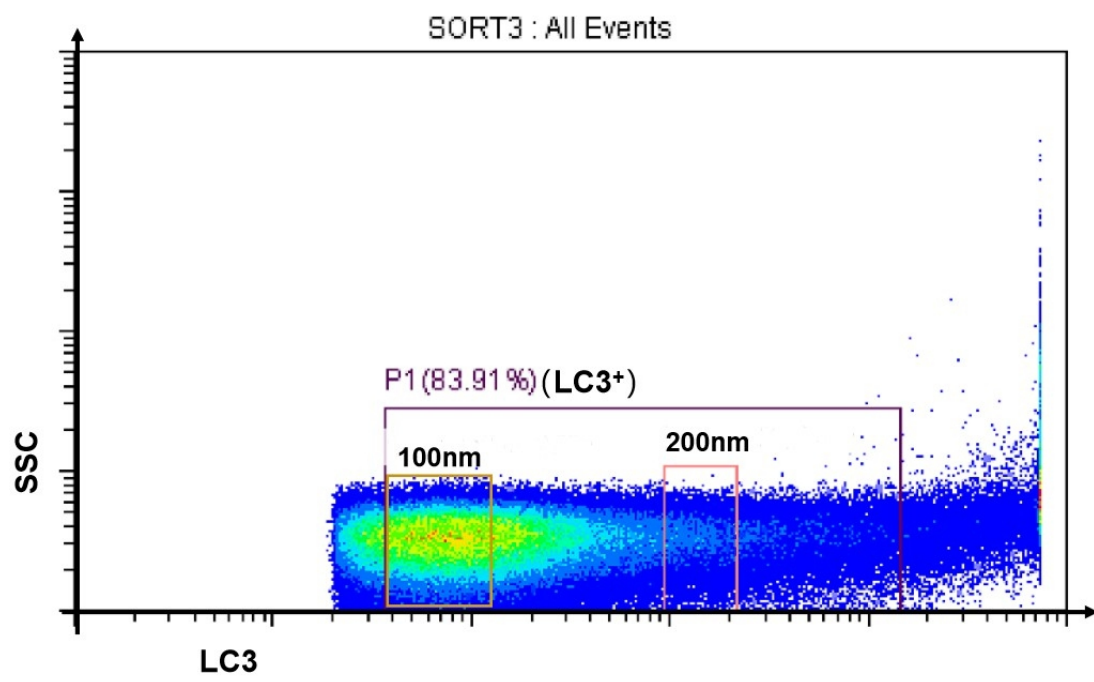

Supp Fig S2.

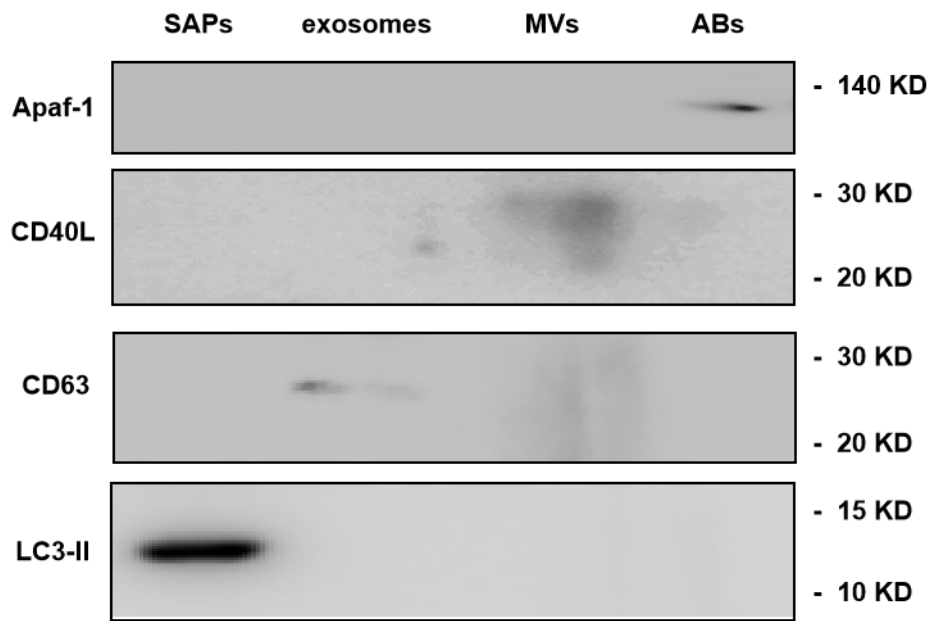

Supp Fig S3.

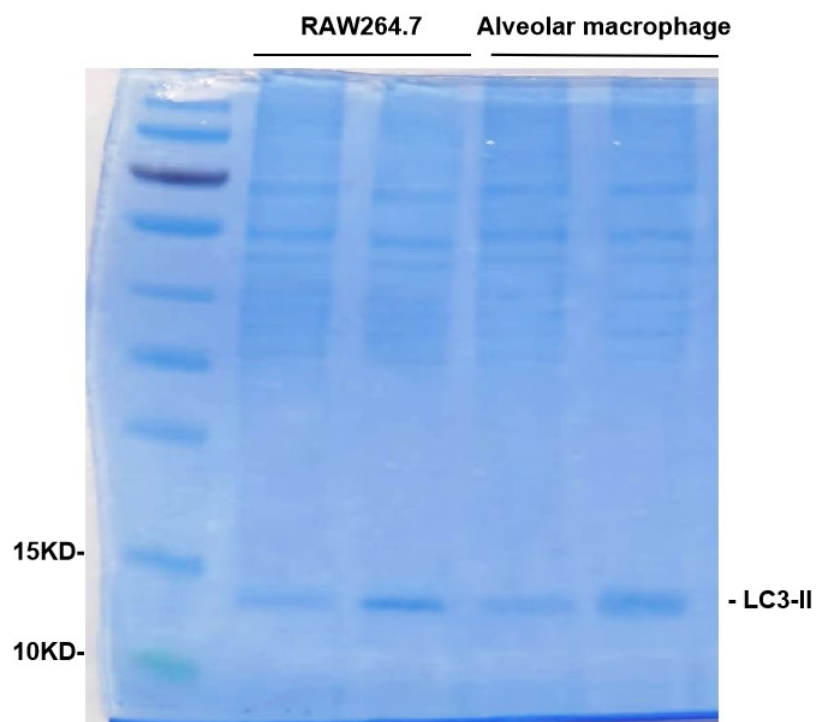

Supp Fig S4.

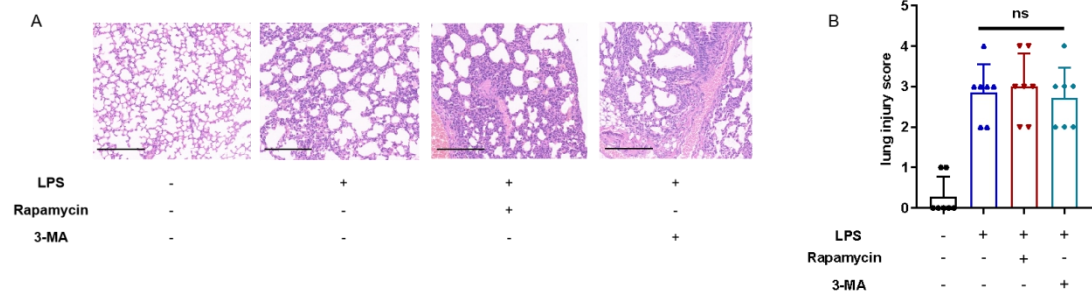

Supplement: Supplementary file 1 [file get_supplementary_file.php]
